# Supplementary material
Source: PubMed Central journal article supplement (PMC6089819)
Supplement: BCP-84-1868-s001.pdf [file BCP-84-1868-s001.pdf]

**Supplementary Figures**

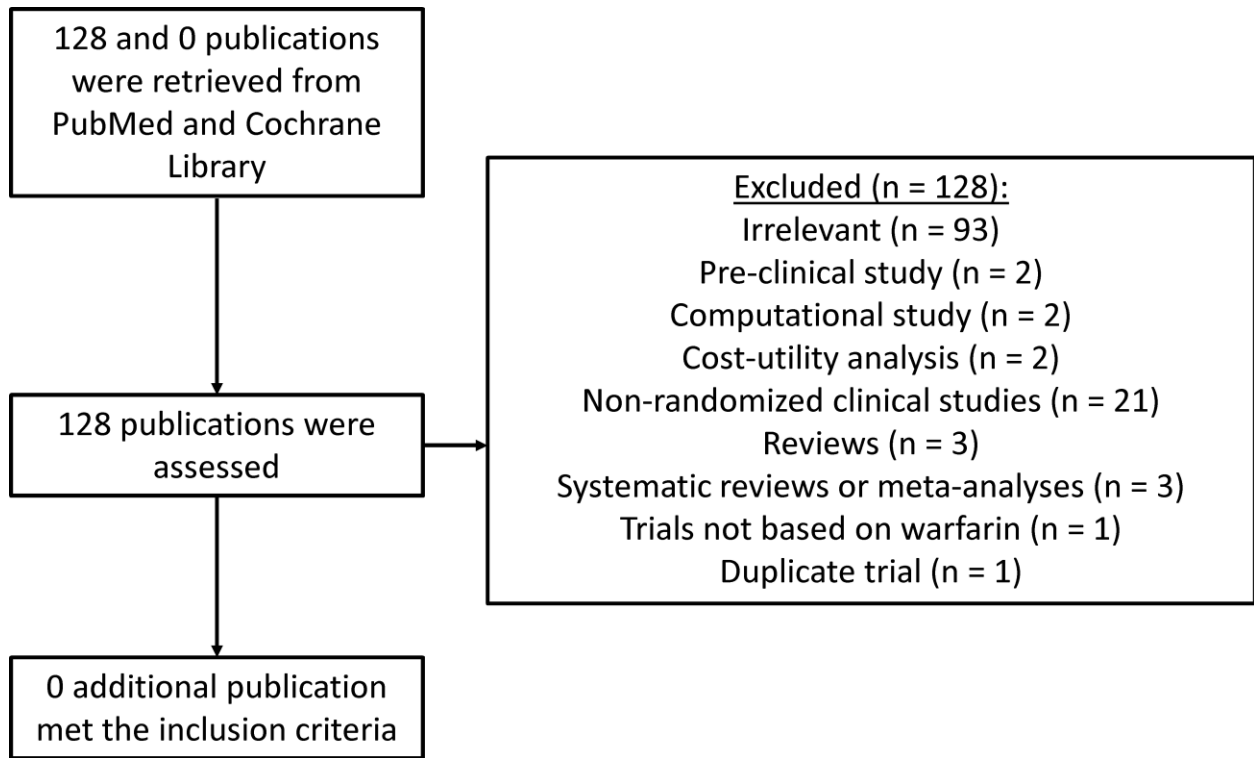

**Supplementary Figure 1.** Additional search using more detailed search terms from February 2017 to March 2018.

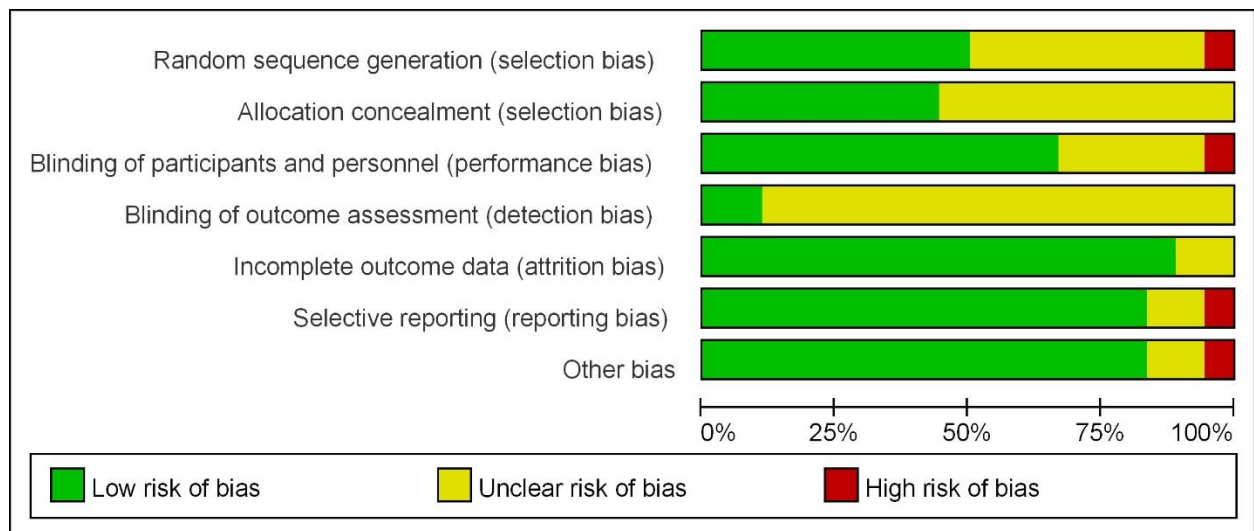

**Supplementary Figure 2.** Risk of bias graph using the Cochrane Risk Assessment Tool.

|                    | Random sequence generation (selection bias) | Allocation concealment (selection bias) | Blinding of participants and personnel (performance bias) | Blinding of outcome assessment (detection bias) | Incomplete outcome data (attrition bias) | Selective reporting (reporting bias) | Other bias |
|--------------------|---------------------------------------------|-----------------------------------------|-----------------------------------------------------------|-------------------------------------------------|------------------------------------------|--------------------------------------|------------|
| Anderson 2007      | ?                                           | ?                                       | +                                                         | ?                                               | +                                        | +                                    | +          |
| Borgman 2012       | ?                                           | ?                                       | ?                                                         | ?                                               | +                                        | +                                    | +          |
| Burmester 2011     | +                                           | +                                       | -                                                         | +                                               | +                                        | +                                    | +          |
| Caraco 2008        | -                                           | ?                                       | ?                                                         | ?                                               | +                                        | -                                    | +          |
| Duan 2016          | ?                                           | ?                                       | ?                                                         | ?                                               | ?                                        | ?                                    | ?          |
| Gage 2017          | +                                           | +                                       | +                                                         | ?                                               | +                                        | +                                    | +          |
| Hillman 2005       | +                                           | +                                       | +                                                         | ?                                               | +                                        | +                                    | +          |
| Huang 2009         | ?                                           | ?                                       | +                                                         | ?                                               | +                                        | +                                    | +          |
| Jin 2017           | ?                                           | ?                                       | +                                                         | ?                                               | +                                        | +                                    | +          |
| Jonas 2013         | +                                           | +                                       | +                                                         | +                                               | +                                        | +                                    | +          |
| Kimmel 2013        | +                                           | ?                                       | +                                                         | ?                                               | +                                        | +                                    | +          |
| Li 2013            | +                                           | +                                       | +                                                         | ?                                               | +                                        | +                                    | +          |
| Pengo 2015         | ?                                           | ?                                       | +                                                         | ?                                               | +                                        | +                                    | -          |
| Pirmohamed 2013    | +                                           | +                                       | +                                                         | ?                                               | +                                        | +                                    | +          |
| Radhakrishnan 2012 | ?                                           | ?                                       | ?                                                         | ?                                               | ?                                        | ?                                    | ?          |
| Suppe 2015         | ?                                           | ?                                       | ?                                                         | ?                                               | +                                        | +                                    | +          |
| Wang 2012          | +                                           | +                                       | +                                                         | ?                                               | +                                        | +                                    | +          |
| Wen 2017           | +                                           | +                                       | +                                                         | ?                                               | +                                        | +                                    | +          |

**Supplementary Figure 3.** Risk of bias summary using the Cochrane Risk Assessment Tool.

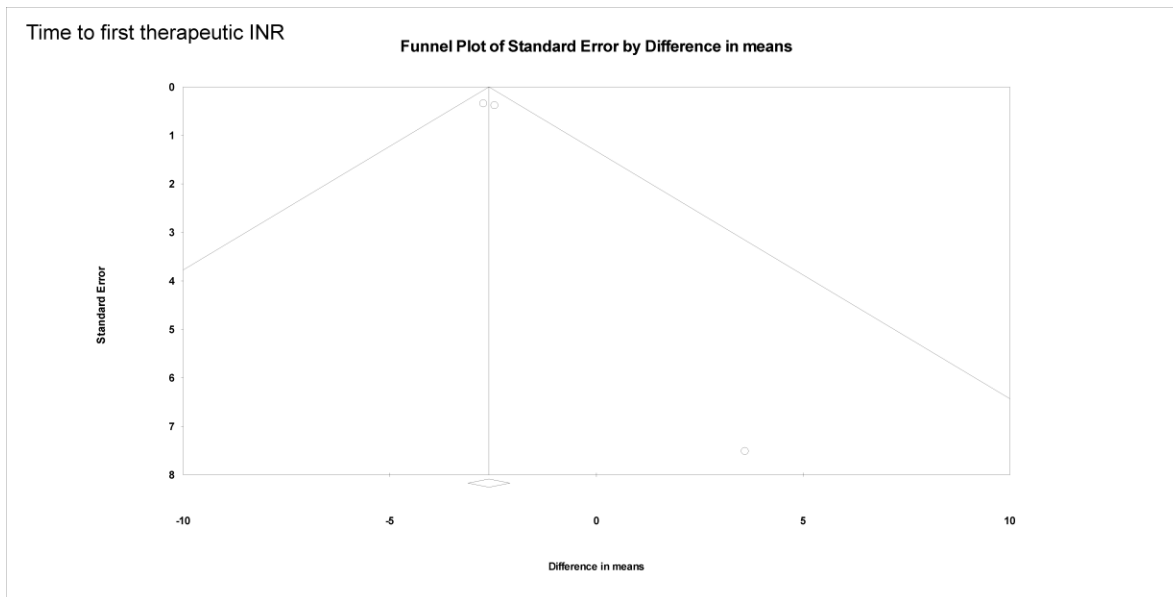

**Supplementary Figure 4.** Funnel plot for time-to-first therapeutic INR.

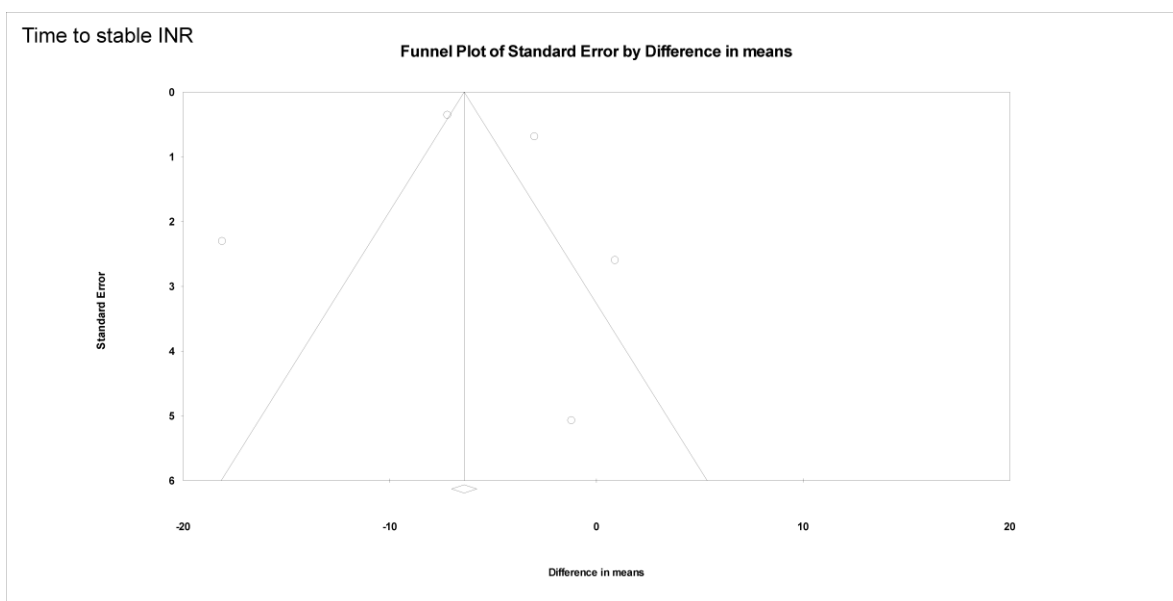

**Supplementary Figure 5.** Funnel plot for time-to-first stable INR.

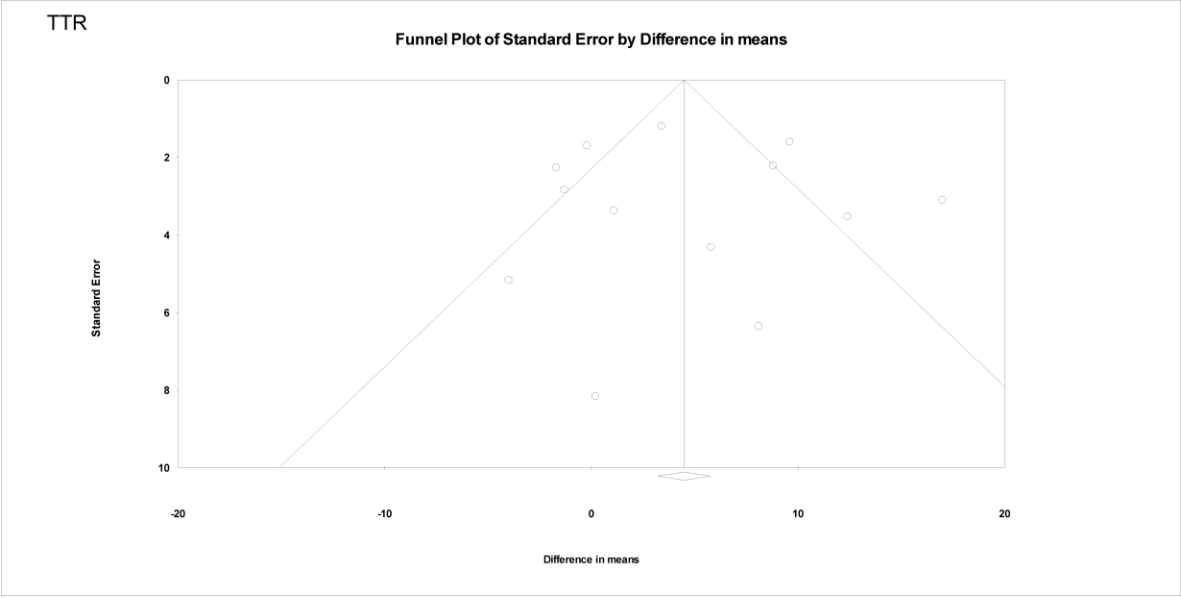

Supplementary Figure 6. Funnel plot for TTR.

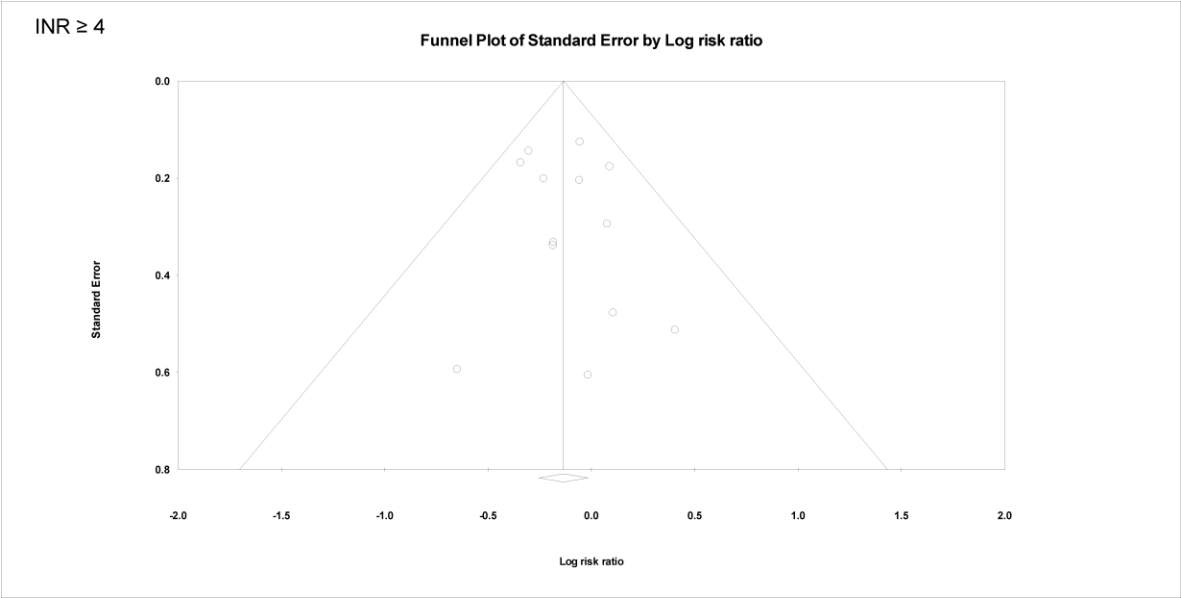

Supplementary Figure 7. Funnel plot for INR  $\geq$  4.

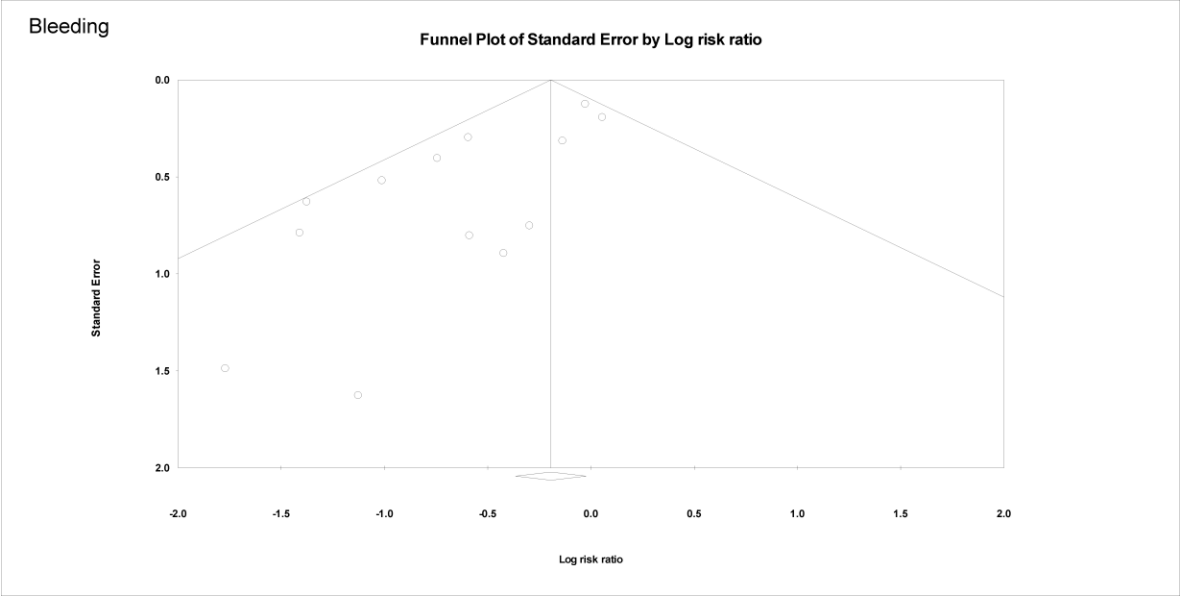

Supplementary Figure 8. Funnel plot for bleeding.

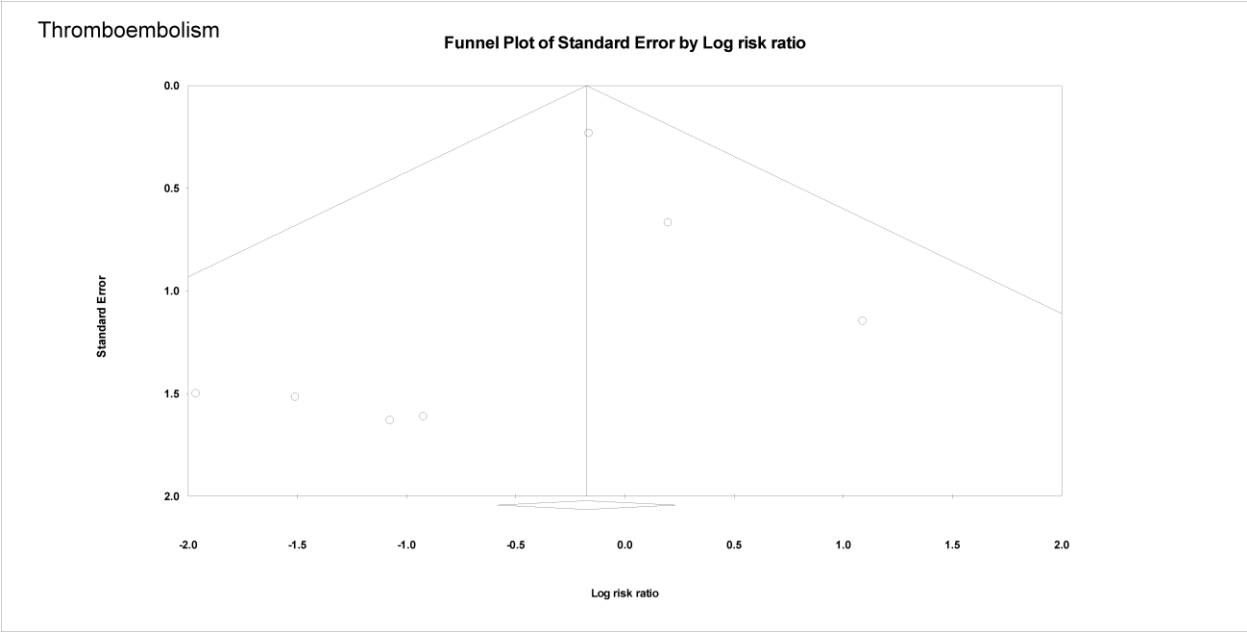

Supplementary Figure 9. Funnel plot for thromboembolism.

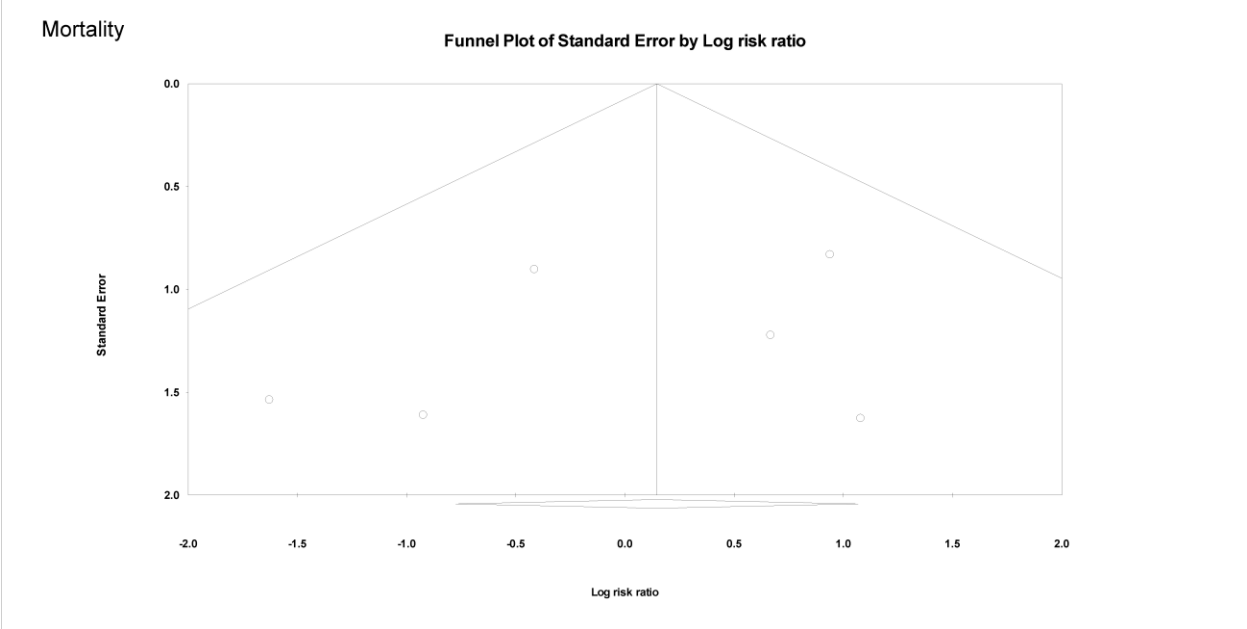

Supplementary Figure 10. Funnel plot for mortality.

Meta-regression of TTR mean difference on the logarithm of risk ratio for INR ≥ 4

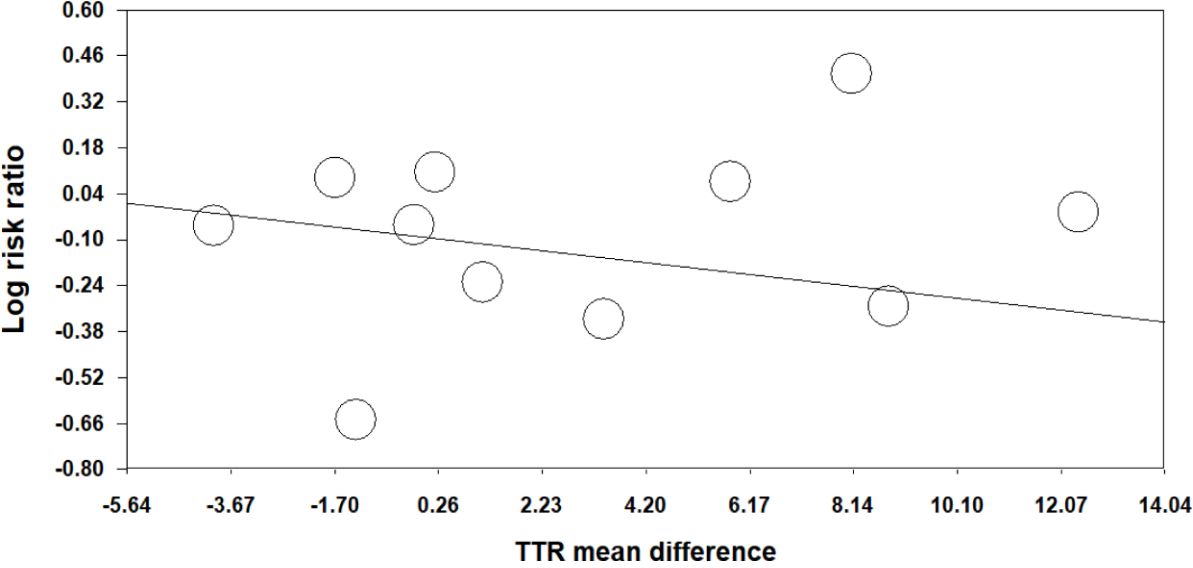

Supplementary Figure 11. meta-regression of TTR mean difference on the logarithm of risk ratio for INR ≥ 4.

Meta-regression of TTR mean difference on the logarithm of risk ratio for bleeding

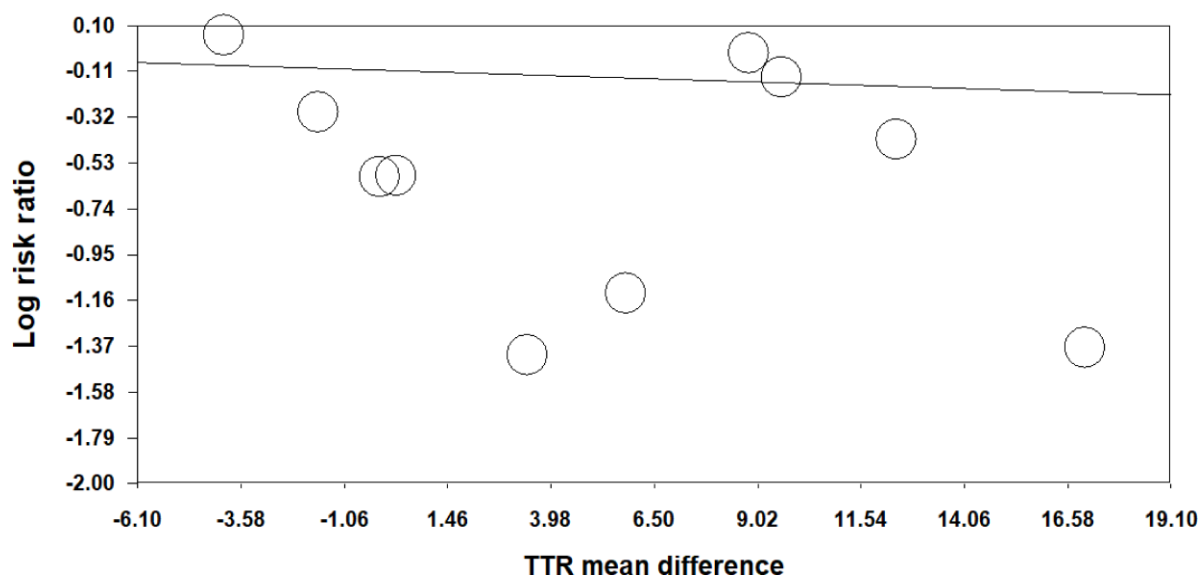

**Supplementary Figure 12.** meta-regression of TTR mean difference on the logarithm of risk ratio for bleeding.

Meta-regression of TTR mean difference on the logarithm of risk ratio for thromboembolism

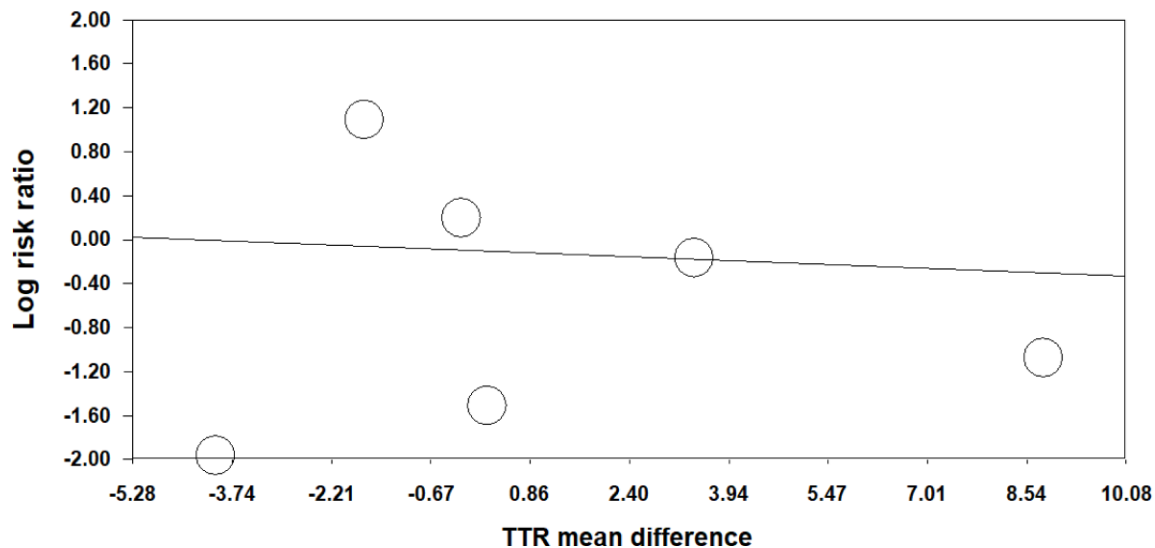

**Supplementary Figure 13.** meta-regression of TTR mean difference on the logarithm of risk ratio for thromboembolism.

Meta-regression of TTR mean difference on the logarithm of risk ratio for mortality

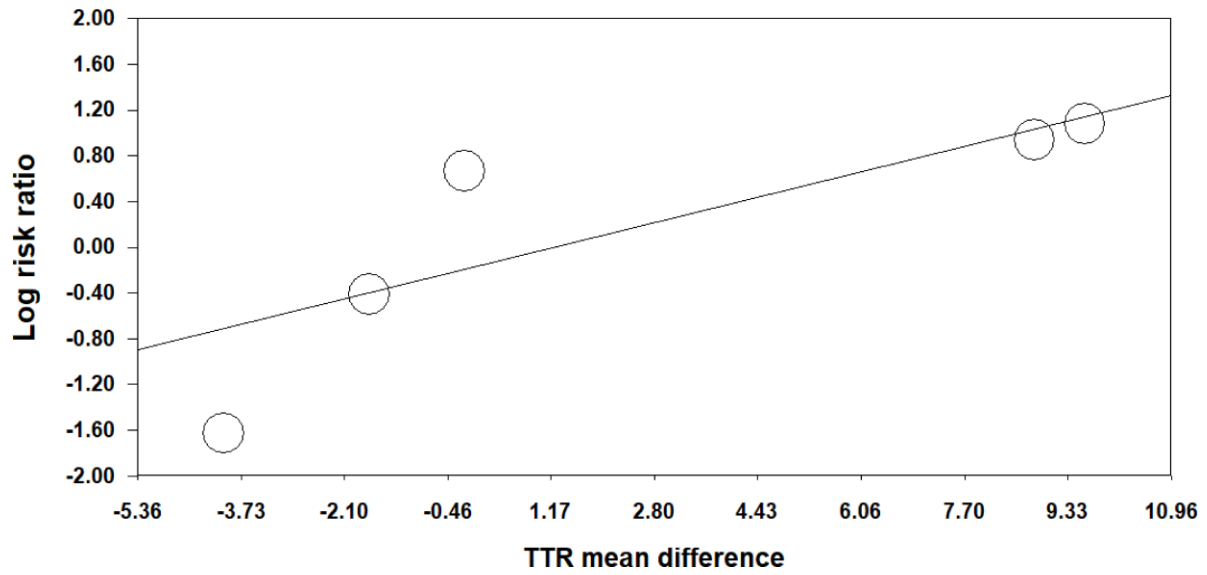

**Supplementary Figure 14.** meta-regression of TTR mean difference on the logarithm of risk ratio for mortality.
